# Supplementary material
Source: publisher figshare collection journal article supplement (https://tandf.figshare.com/articles/dataset/_/4793320)
Supplement: Supplementary file 1 [file 1]

***Supplemental Digital Content S2: Baseline characteristics of study population***

Baseline characteristics were compared between preterm (PT; <37 weeks) vs term (T; ≥37weeks) and infants born to mothers with either CA or PPRM population vs others. Data for gestational age and maternal age are presented as median. Data for race, gender (M: male), PIH and Smoking are presented as percentage.

|                              | Preterm vs Term   |                |                  | CA and/or PPRM    |                  |                  |
|------------------------------|-------------------|----------------|------------------|-------------------|------------------|------------------|
|                              | Preterm<br>(N=61) | Term<br>(N=22) | P-value          | Present<br>(N=42) | Absent<br>(N=41) | P-value          |
| <b>Gestational age (wks)</b> | 30                | 39             | <b>&lt;0.001</b> | 29.6              | 35.6             | <b>&lt;0.001</b> |
| <b>Maternal age (yr)</b>     | 27.9              | 27.8           | 0.933            | 27                | 29               | 0.152            |
| <b>Race (white)</b>          | 68%               | 78%            | 0.436            | 78.6%             | 73.2%            | 0.389            |
| <b>Gender (M)</b>            | 54%               | 45%            | 0.618            | 53.7%             | 50%              | 0.824            |
| <b>PIH</b>                   | 26.2%             | 4.5%           | <b>0.06</b>      | 35.7%             | 4.9%             | <b>0.0013</b>    |
| <b>Maternal smoking</b>      | 14.8%             | 9.1%           | 0.458            | 17.1%             | 9.5%             | 0.290            |
