# Supplementary material
Source: publisher figshare collection journal article supplement (https://tandf.figshare.com/articles/dataset/_/4793320)
Supplement: Supplementary file 2 [file 1]

***Supplemental Digital Content S1: Description of genes included in the study***

| <b>Gene symbol</b> | <b>Gene name</b>                                                                    | <b>Function</b>                                                                                                                                                                                            |
|--------------------|-------------------------------------------------------------------------------------|------------------------------------------------------------------------------------------------------------------------------------------------------------------------------------------------------------|
| TLR2               | Toll-like receptor 2                                                                | Recognize a wide set of bacterial products including components of Gram-positive bacterial cell walls, peptidoglycans and lipoproteins.                                                                    |
| TLR4               | Toll-like receptor 4                                                                | Recognize Gram-negative bacteria (LPS)                                                                                                                                                                     |
| TLR5               | Toll-like receptor 5                                                                | Recognize bacterial Flagellin.                                                                                                                                                                             |
| TLR9               | Toll-like receptor 9                                                                | Recognize PAMPs expressed on infectious agents                                                                                                                                                             |
| MYD88              | Myeloid differentiation primary response gene (88)                                  | Downstream signal adaptor molecule in TLR pathway                                                                                                                                                          |
| NOD1               | Nucleotide-binding oligomerization domain containing 1                              | Intracellular pattern-recognition receptors (PRR) that recognizes the bacterial peptidoglycan-derived peptides                                                                                             |
| NOD2               | Nucleotide-binding oligomerization domain containing 2                              | Intracellular PRR that recognizes the minimal peptidoglycan muramyl dipeptide (MDP), common to all bacteria                                                                                                |
| RIPK2              | Receptor-interacting serine-threonine kinase 2                                      | Key downstream signal adaptor molecule for NOD dependent signaling                                                                                                                                         |
| NFKB1              | Nuclear factor of kappa light polypeptide gene enhancer in B-cells 1                | Downstream transcription factor in TLR/NLR pathway. The 105 kD protein is a transcription inhibitor and the precursor of the 50 kD protein (a DNA binding subunit of the NF-kappa-B (NFKB) protein complex |
| NFKBIA             | Nuclear factor of kappa light polypeptide gene enhancer in B-cells inhibitor, alpha | Inhibitor of NF-kappa-B complex                                                                                                                                                                            |
| IKBKB              | Inhibitor of kappa light polypeptide gene enhancer in B-cells, kinase beta          | Cause dissociation of the inhibitor and activation of NF-kappa-B                                                                                                                                           |
| IL-1B              | Interleukin 1 beta                                                                  | Mediator of the inflammatory response and is involved in a variety of cellular activities including cell proliferation differentiation and apoptosis                                                       |
| IL6                | Interleukin 6 (interferon, beta 2)                                                  | Secreted into the serum and induces a transcriptional inflammatory response                                                                                                                                |
