# Supplementary material
Source: publisher figshare collection journal article supplement (https://tandf.figshare.com/articles/dataset/_/4793320)

### Supplemental Digital Content S3: Relative gene expression in placentas with evidence of inflammation

Relative expression after log transformation of genes in placenta with evidence of either chorioamnionitis or PPRM is presented against gestational age in weeks. Data are representative of 41 placental samples from patients with evidence of either chorioamnionitis (CA) or preterm premature rupture of membrane (PPROM). Individual p-value are presented for each gene

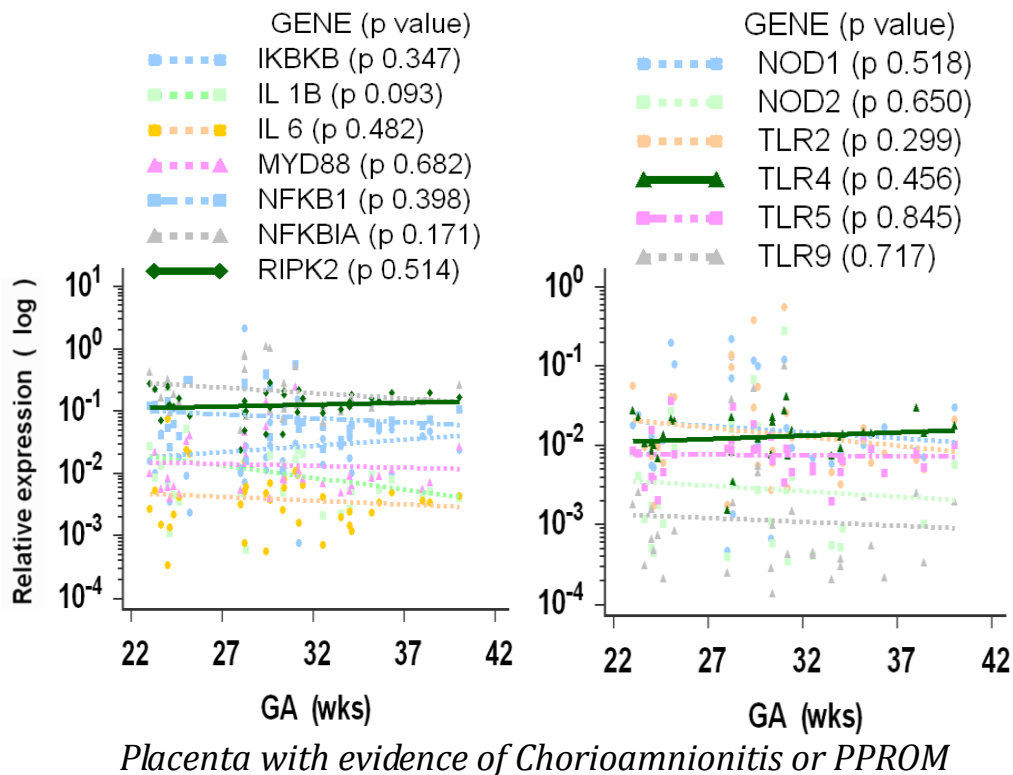

Supplement: Supplementary file 3 [file 1]
